# Supplementary material for: Optimal Timing and Early Intervention With Anticoagulant Therapy for Sepsis-Induced Disseminated Intravascular Coagulation
Source: PubMed Central journal article supplement — Clin Appl Thromb Hemost. 2019 Mar 6;25:1076029619835055. doi: 10.1177/1076029619835055 (PMC6714922; doi:10.1177/1076029619835055), 2019-03-06
Supplement: Supplmental_Tables.pdf [file Supplmental_Tables.pdf]

**Table S1.** The 26 variables used to calculate the propensity score in the logistic regression model

---

|                             |                                                                                                                                                     |
|-----------------------------|-----------------------------------------------------------------------------------------------------------------------------------------------------|
| Patient characteristics     | Age, sex, body weight                                                                                                                               |
| Illness severity            | SOFA score, APACHE II score, positive blood culture                                                                                                 |
| Source of ICU admission     | Emergency department/ward/other hospital                                                                                                            |
| Pre-existing condition      | Liver insufficiency, chronic heart failure, chronic respiratory disorder, chronic hemodialysis, immunocompromise                                    |
| SOFA sub-score              | Respiratory, cardiovascular, renal, hepatic, GCS                                                                                                    |
| ICU characteristics         | Closed ICU/open ICU/other, volume of ICU                                                                                                            |
| Primary source of infection | Abdomen/lung/urinary tract/bone+soft tissue/central nervous system/other/unknown                                                                    |
| Causal microorganisms       | Gram-positive bacteria/Gram-negative bacteria/mixed organisms/other/unknown                                                                         |
| Therapeutic interventions   | Immunoglobulin, low-dose steroid, renal replacement therapy, low-dose heparin for prophylaxis against venous thromboembolism, surgical intervention |

---

Abbreviations: SOFA, Sequential Organ Failure Assessment; APACHE, Acute Physiology and Chronic Health Evaluation; ICU, intensive care unit; GCS, Glasgow Coma Score.

**Table S2.** Baseline characteristics in patients with and without anticoagulant therapy by each cut-off point of the JAAM DIC scoring system

|                              | JAAM DIC score |            |            |            |            |            |            |            |            | Total<br>n=2197 |
|------------------------------|----------------|------------|------------|------------|------------|------------|------------|------------|------------|-----------------|
|                              | 0<br>n=41      | 1<br>n=193 | 2<br>n=310 | 3<br>n=326 | 4<br>n=275 | 5<br>n=361 | 6<br>n=306 | 7<br>n=127 | 8<br>n=258 |                 |
| Patient characteristics      |                |            |            |            |            |            |            |            |            |                 |
| Age (years)                  | 75 (62-81)     | 74 (63-81) | 71 (61-80) | 73 (62-81) | 74 (64-81) | 72 (63-80) | 72 (63-80) | 73 (62-81) | 71 (60-80) | 72 (62-80)      |
| Sex, male                    | 25 (61%)       | 123 (64%)  | 211 (68%)  | 189 (58%)  | 153 (56%)  | 211 (58%)  | 172 (56%)  | 77 (61%)   | 133 (52%)  | 1294 (59%)      |
| Illness severity             |                |            |            |            |            |            |            |            |            |                 |
| APACHE II score              | 17 (11-22)     | 19 (15-24) | 20 (15-26) | 21 (16-28) | 22 (16-27) | 23 (17-28) | 24 (18-30) | 24 (17-31) | 26 (20-32) | 22 (17-28)      |
| SOFA score                   | 6 (3-8)        | 7 (4-9)    | 7 (5-9)    | 9 (6-11)   | 8 (6-11)   | 9 (7-12)   | 11 (8-13)  | 11 (9-13)  | 13 (10-15) | 9 (6-12)        |
| Source of ICU admission      |                |            |            |            |            |            |            |            |            |                 |
| Emergency department         | 28 (68%)       | 118 (61%)  | 144 (46%)  | 145 (44%)  | 128 (47%)  | 160 (44%)  | 130 (42%)  | 59 (46%)   | 124 (48%)  | 1036 (47%)      |
| Ward                         | 10 (24%)       | 47 (24%)   | 95 (31%)   | 88 (27%)   | 77 (28%)   | 109 (30%)  | 103 (34%)  | 42 (33%)   | 72 (28%)   | 643 (29%)       |
| Other hospital               | 3 (7%)         | 28 (15%)   | 71 (23%)   | 93 (29%)   | 70 (25%)   | 92 (25%)   | 73 (24%)   | 26 (20%)   | 62 (24%)   | 518 (24%)       |
| Pre-existing comorbidities   |                |            |            |            |            |            |            |            |            |                 |
| Immunocompromised            | 3 (7%)         | 18 (9%)    | 31 (10%)   | 39 (12%)   | 30 (11%)   | 34 (9%)    | 33 (11%)   | 8 (6%)     | 35 (14%)   | 231 (11%)       |
| Chronic kidney disease       | 0 (0%)         | 13 (7%)    | 28 (9%)    | 20 (6%)    | 23 (8%)    | 32 (9%)    | 23 (8%)    | 12 (9%)    | 16 (6%)    | 167 (8%)        |
| Chronic heart failure        | 4 (10%)        | 20 (10%)   | 22 (7%)    | 13 (4%)    | 14 (5%)    | 16 (4%)    | 10 (3%)    | 11 (9%)    | 15 (6%)    | 125 (6%)        |
| Chronic respiratory disorder | 0 (0%)         | 11 (6%)    | 21 (7%)    | 9 (3%)     | 13 (5%)    | 17 (5%)    | 7 (2%)     | 4 (3%)     | 7 (3%)     | 89 (4%)         |
| Liver insufficiency          | 0 (0%)         | 0 (0%)     | 2 (1%)     | 1 (0%)     | 4 (1%)     | 4 (1%)     | 3 (1%)     | 1 (1%)     | 2 (1%)     | 17 (1%)         |
| Site of infection            |                |            |            |            |            |            |            |            |            |                 |
| Abdomen                      | 5 (12%)        | 45 (23%)   | 84 (27%)   | 115 (35%)  | 87 (32%)   | 132 (37%)  | 117 (38%)  | 45 (35%)   | 75 (29%)   | 705 (32%)       |
| Lung                         | 18 (44%)       | 82 (42%)   | 107 (35%)  | 95 (29%)   | 80 (29%)   | 85 (24%)   | 49 (16%)   | 15 (12%)   | 32 (12%)   | 563 (26%)       |
| Urinary tract                | 8 (20%)        | 31 (16%)   | 36 (12%)   | 36 (11%)   | 48 (17%)   | 69 (19%)   | 60 (20%)   | 20 (16%)   | 83 (32%)   | 391 (18%)       |

|                            |          |          |           |           |           |           |           |          |           |           |
|----------------------------|----------|----------|-----------|-----------|-----------|-----------|-----------|----------|-----------|-----------|
| Bone/soft tissue           | 8 (20%)  | 25 (13%) | 46 (15%)  | 43 (13%)  | 32 (12%)  | 37 (10%)  | 39 (13%)  | 19 (15%) | 18 (7%)   | 267 (12%) |
| Central nervous system     | 2 (5%)   | 4 (2%)   | 3 (1%)    | 5 (2%)    | 5 (2%)    | 5 (1%)    | 6 (2%)    | 7 (6%)   | 14 (5%)   | 51 (2%)   |
| Other/unknown              | 0 (0%)   | 6 (3%)   | 34 (11%)  | 32 (10%)  | 23 (8%)   | 33 (9%)   | 35 (11%)  | 21 (17%) | 36 (14%)  | 220 (10%) |
| Therapeutic interventions  |          |          |           |           |           |           |           |          |           |           |
| Immunoglobulin             | 6 (15%)  | 35 (18%) | 76 (25%)  | 111 (34%) | 91 (33%)  | 115 (32%) | 107 (35%) | 54 (43%) | 102 (40%) | 697 (32%) |
| Low-dose steroid           | 6 (15%)  | 32 (17%) | 58 (19%)  | 79 (24%)  | 63 (23%)  | 82 (23%)  | 88 (29%)  | 37 (29%) | 99 (38%)  | 544 (25%) |
| Renal replacement therapy  | 3 (7%)   | 29 (15%) | 58 (19%)  | 81 (25%)  | 66 (24%)  | 99 (27%)  | 104 (34%) | 58 (46%) | 103 (40%) | 601 (27%) |
| Surgical intervention      | 14 (34%) | 56 (29%) | 135 (44%) | 154 (47%) | 113 (41%) | 144 (40%) | 146 (48%) | 56 (44%) | 109 (42%) | 927 (42%) |
| Antithrombin               | 3 (7%)   | 21 (11%) | 56 (18%)  | 95 (29%)  | 93 (34%)  | 129 (36%) | 132 (43%) | 62 (49%) | 138 (53%) | 729 (33%) |
| Recombinant thrombomodulin | 0 (0%)   | 15 (8%)  | 46 (15%)  | 76 (23%)  | 71 (26%)  | 127 (35%) | 121 (40%) | 60 (47%) | 128 (50%) | 644 (29%) |
| Heparin/Heparinoid         | 2 (5%)   | 8 (4%)   | 9 (3%)    | 18 (6%)   | 24 (9%)   | 14 (4%)   | 13 (4%)   | 13 (10%) | 20 (8%)   | 121 (6%)  |
| Outcomes                   |          |          |           |           |           |           |           |          |           |           |
| In-hospital mortality      | 6 (15%)  | 38 (20%) | 60 (19%)  | 78 (24%)  | 78 (28%)  | 124 (34%) | 106 (35%) | 47 (37%) | 102 (40%) | 639 (29%) |
| With anticoagulant         | 0 (0%)   | 12 (30%) | 19 (22%)  | 34 (22%)  | 42 (29%)  | 69 (35%)  | 66 (34%)  | 30 (33%) | 71 (37%)  | 343 (31%) |
| Without anticoagulant      | 6 (16%)  | 26 (17%) | 41 (18%)  | 44 (25%)  | 36 (27%)  | 55 (34%)  | 40 (35%)  | 17 (49%) | 31 (46%)  | 296 (27%) |
| Bleeding complications     | 3 (7%)   | 16 (8%)  | 25 (8%)   | 31 (10%)  | 31 (11%)  | 50 (14%)  | 47 (15%)  | 17 (13%) | 33 (13%)  | 253 (12%) |
| With anticoagulant         | 0 (0%)   | 6 (15%)  | 6 (7%)    | 17 (11%)  | 22 (15%)  | 38 (19%)  | 35 (18%)  | 11 (12%) | 30 (16%)  | 165 (15%) |
| Without anticoagulant      | 3 (8%)   | 10 (7%)  | 19 (9%)   | 14 (8%)   | 9 (7%)    | 12 (7%)   | 12 (11%)  | 6 (17%)  | 3 (4%)    | 88 (8%)   |

Abbreviations: JAAM, Japanese Association for Acute Medicine; DIC, disseminated intravascular coagulation; APACHE, Acute Physiology and Chronic Health Evaluation; SOFA, Sequential Organ Failure Assessment; ICU, intensive care unit.

**Table S3.** Actual sample size and estimated mortality in the anticoagulant and control groups according to each cut-off point of the ISTH overt DIC scoring system

| Cut-off | Criteria negative (ISTH overt DIC score < cut-off point) |               |           |           |           | Criteria positive (ISTH overt DIC score ≥ cut-off point) |               |           |           |           |
|---------|----------------------------------------------------------|---------------|-----------|-----------|-----------|----------------------------------------------------------|---------------|-----------|-----------|-----------|
|         | Sample size                                              | Anticoagulant |           | Control   |           | Sample size                                              | Anticoagulant |           | Control   |           |
|         |                                                          | Mortality     | 95% CI    | Mortality | 95% CI    |                                                          | Mortality     | 95% CI    | Mortality | 95% CI    |
| 1       | 161                                                      | 9.5           | 1.1-48.5  | 19.9      | 9.6-36.9  | 1732                                                     | 27.3          | 18-39.2   | 37.2      | 31.6-43.1 |
| 2       | 293                                                      | 14            | 3.7-40.5  | 19.2      | 11.9-29.6 | 1600                                                     | 27.9          | 18.1-40.5 | 39        | 33.1-45.4 |
| 3       | 536                                                      | 20.8          | 7.4-46.3  | 24.8      | 16.2-35.9 | 1357                                                     | 27.9          | 17.7-41   | 40.7      | 34.4-47.4 |
| 4       | 906                                                      | 20.5          | 10.1-36.9 | 26.9      | 20.4-34.7 | 987                                                      | 30.4          | 17.7-47   | 44.7      | 36.7-52.9 |
| 5       | 1339                                                     | 22.9          | 13.4-36.4 | 30.3      | 24.4-36.9 | 554                                                      | 33.7          | 16.7-56.2 | 49.9      | 39.2-60.6 |
| 6       | 1630                                                     | 24.4          | 15.3-36.5 | 32.4      | 26.9-38.3 | 263                                                      | 37.5          | 13.7-69.3 | 54.4      | 38.9-69.1 |
| 7       | 1804                                                     | 25.8          | 16.8-37.4 | 34        | 28.6-39.7 | 89                                                       | 40.1          | 6.7-86.1  | 59.9      | 34.4-81   |
| 8       | 1877                                                     | 26.1          | 17.3-37.4 | 34.9      | 29.6-40.5 | 16                                                       | 65.4          | 32-88.4   | 65.4      | 32-88.4   |
| Total   | 1893                                                     | 26.5          | 17.6-37.7 | 35.2      | 30-40.8   |                                                          |               |           |           |           |

Abbreviations: ISTH, International Society of Thrombosis and Hemostasis; DIC, disseminated intravascular coagulation; CI, confidence interval.

**Table S4.** Actual sample size and estimated mortality in the anticoagulant and control groups according to each cut-off point of the JAAM DIC scoring system

| Cut-off | Criteria negative (JAAM DIC score < cut-off point) |               |           |           |           | Criteria positive (JAAM DIC score ≥ cut-off point) |               |           |           |           |
|---------|----------------------------------------------------|---------------|-----------|-----------|-----------|----------------------------------------------------|---------------|-----------|-----------|-----------|
|         | Sample size                                        | Anticoagulant |           | Control   |           | Sample size                                        | Anticoagulant |           | Control   |           |
|         |                                                    | Mortality     | 95% CI    | Mortality | 95% CI    |                                                    | Mortality     | 95% CI    | Mortality | 95% CI    |
| 1       | 41                                                 | 13.5          | 5.6-28.9  | 13.5      | 5.6-28.9  | 2156                                               | 28.0          | 19.4-38.4 | 35.4      | 30.6-40.5 |
| 2       | 234                                                | 18.1          | 6.1-43.1  | 14.4      | 10.1-20.1 | 1963                                               | 28.4          | 19.4-39.5 | 37.9      | 32.7-43.3 |
| 3       | 544                                                | 22.1          | 9.6-43.0  | 17.6      | 12.8-23.7 | 1653                                               | 28.8          | 19.1-41.1 | 42.1      | 36.2-48.3 |
| 4       | 870                                                | 21.2          | 10.0-39.6 | 24.5      | 18.0-32.3 | 1327                                               | 30.7          | 19.9-44.2 | 43.7      | 37.3-50.3 |
| 5       | 1145                                               | 22.1          | 11.7-37.6 | 27.4      | 21.2-34.6 | 1052                                               | 32.5          | 20.3-47.6 | 44.8      | 37.7-52.1 |
| 6       | 1506                                               | 25.4          | 15.6-38.4 | 29.9      | 24.5-35.8 | 691                                                | 32.1          | 17.2-51.8 | 46.9      | 37.6-56.5 |
| 7       | 1812                                               | 26.6          | 17.5-38.1 | 31.3      | 26.5-36.7 | 385                                                | 32.6          | 13.6-59.8 | 52.8      | 39.7-65.5 |
| 8       | 1939                                               | 26.8          | 18.0-37.9 | 32.9      | 28.0-38.1 | 258                                                | 34.4          | 12.0-67.0 | 51.5      | 35.9-66.8 |
| Total   | 2197                                               | 27.8          | 19.4-38.2 | 34.8      | 30.2-39.8 |                                                    |               |           |           |           |

Abbreviations: JAAM, Japanese Association for Acute Medicine; DIC, disseminated intravascular coagulation; CI, confidence interval.
